# Supplementary material for: Volume of Light Versus Moderate‐to‐Vigorous Physical Activity: Similar Benefits for All‐Cause Mortality?
Source: PubMed Central journal article supplement — J Am Heart Assoc. 2018 Apr 2;7(7):e008815. doi: 10.1161/JAHA.118.008815 (PMC5907606; doi:10.1161/jaha.118.008815), 2018-04-02
Supplement: JAH3-7-e008815-s001.pdf [file JAH3-7-e008815-s001.pdf]

# **SUPPLEMENTAL MATERIAL**

**Table S1. Weighted means (Standard Error) for physical activity variables by quartiles of light and moderate-to-vigorous physical activity.**

|                                    | Light PA    |             |             |             | Moderate-to-Vigorous PA |             |             |             |
|------------------------------------|-------------|-------------|-------------|-------------|-------------------------|-------------|-------------|-------------|
|                                    | Q1          | Q2          | Q3          | Q4          | Q1                      | Q2          | Q3          | Q4          |
|                                    | (n = 1159)  | (n = 1215)  | (n = 1236)  | (n = 1230)  | (n = 1174)              | (n = 1217)  | (n = 1229)  | (n = 1220)  |
|                                    | % (SE)                  | % (SE)      | % (SE)      | % (SE)      |
| <b>Physical Activity (counts)</b>  |             |             |             |             |                         |             |             |             |
| Sedentary (AC<100)                 | 7.7 (0.1)   | 8.3 (0.1)   | 8.7 (0.1)   | 8.6 (0.1)   | 8.3 (0.1)               | 8.6 (0.1)   | 8.5 (0.1)   | 8.0 (0.1)   |
| Light (100≥AC<760)                 | 47.7 (0.4)  | 71.6 (0.2)  | 89.1 (0.2)  | 115.1 (0.6) | 58.5 (0.80)             | 80.5 (0.7)  | 89.4 (0.7)  | 93.4 (0.6)  |
| Moderate-to-vigorous (AC≥760)      | 85.2 (4.4)  | 141.8 (4.8) | 167.8 (4.3) | 198.3 (0.6) | 27.1 (0.5)              | 80.2 (0.7)  | 145.5 (0.8) | 288.5 (3.0) |
| Total (AC≥100)                     | 133.0 (4.6) | 213.4 (4.8) | 256.9 (4.3) | 313.5 (4.8) | 85.6 (1.2)              | 160.7 (0.9) | 234.9 (0.8) | 381.6 (2.9) |
| <b>Physical Activity (minutes)</b> |             |             |             |             |                         |             |             |             |
| Sedentary (AC<100)                 | 582.0 (4.3) | 519.2 (3.9) | 474.2 (4.3) | 417.7 (3.3) | 572.9 (4.4)             | 520.6 (2.9) | 484.0 (4.2) | 432.8 (3.8) |
| Light (100≥AC<760)                 | 163.4 (1.2) | 224.2 (0.9) | 270.5 (0.7) | 336.5 (1.6) | 202.6 (2.6)             | 251.7 (1.9) | 268.9 (2.0) | 272.2 (1.5) |
| Moderate-to-vigorous (AC≥760)      | 49.6 (2.1)  | 86.9 (2.1)  | 110.2 (2.1) | 137.1 (2.4) | 22.7 (0.4)              | 62.0 (0.5)  | 101.7 (0.7) | 169.9 (1.5) |
| Total (AC≥100)                     | 352.9 (2.3) | 212.9 (2.6) | 380.7 (2.3) | 473.6 (2.7) | 225.4 (2.9)             | 313.7 (2.1) | 370.6 (2.3) | 442.1 (2.1) |
| <b>Wear Time (minutes)</b>         | 794.9 (4.2) | 830.3 (4.8) | 854.9 (4.4) | 891.3 (4.8) | 798.3 (4.9)             | 834.3 (3.1) | 854.5 (3.2) | 874.9 (4.6) |
| <b>Number of Valid Days</b>        | 5.1 (0.1)   | 5.7 (0.1)   | 5.8 (0.1)   | 5.9 (0.1)   | 5.3 (0.1)               | 5.6 (0.1)   | 5.8 (0.1)   | 5.8 (0.1)   |

AC – Activity counts

PA – Physical activity

Light PA Quartiles: Q1- 1<sup>st</sup> Quartile (AC ≤61.8); Q2 – 2<sup>nd</sup> Quartile (61.8< AC ≤80.5); Q3 – 3<sup>rd</sup> Quartile (80.5< AC ≤ 98.5); Q4 – 4<sup>th</sup> Quartile (AC > 98.5)

Moderate-to-Vigorous PA Quartiles: Q1- 1<sup>st</sup> Quartile (AC ≤13.7); Q2 – 2<sup>nd</sup> Quartile (13.7< AC ≤49.1); Q3 – 3<sup>rd</sup> Quartile (49.1< AC ≤ 113.6); Q4 – 4<sup>th</sup> Quartile (AC > 113.6)

Weighted mean (Standard Error) age for quartiles 1 through 4 of Light PA were 62.5 (0.6), 57.1 (0.4), 55.3 (0.6), and 53.6 (0.2) yrs, respectively;

Weighted mean (Standard Error) age for quartiles 1 through 4 of Moderate-to-Vigorous PA were 69.9 (0.6), 58.0 (0.5), 54.2 (0.4), and 50.6 (0.4) yrs, respectively.

**Table S2. U.S. population weighted means (Standard Error) for physical activity counts and minutes across joint classifications of light and moderate-to-vigorous physical activity quartiles.**

| Moderate-to-vigorous PA            | Light PA |              |                 |             |                 |             |          |             |
|------------------------------------|----------|--------------|-----------------|-------------|-----------------|-------------|----------|-------------|
|                                    | AC ≤61.8 |              | 61.8 < AC ≤80.5 |             | 80.5 < AC ≤98.5 |             | AC >98.5 |             |
| <b>Physical activity (counts)</b>  | N        | Mean (SE)    | N               | Mean (SE)   | N               | Mean (SE)   | N        | Mean (SE)   |
| Sedentary (<100)                   |          |              |                 |             |                 |             |          |             |
| AC ≤50.8                           | 717      | 7.8 (0.1)    | 288             | 8.4 (0.2)   | 115             | 9.2 (0.3)   | 54       | 10.2 (0.5)  |
| 50.8 < AC ≤110.2                   | 228      | 7.4 (0.1)    | 375             | 8.4 (0.1)   | 371             | 9.2 (0.2)   | 243      | 9.2 (0.1)   |
| 110.2 < AC ≤187.9                  | 122      | 7.7 (0.3)    | 302             | 8.4 (0.2)   | 387             | 8.7 (0.1)   | 418      | 8.7 (0.1)   |
| AC >187.9                          | 92       | 7.4 (0.2)    | 250             | 7.9 (0.1)   | 363             | 8.1 (0.1)   | 515      | 8.1 (0.1)   |
| Light PA (100 ≥ AC < 760)          |          |              |                 |             |                 |             |          |             |
| AC ≤50.8                           | 717      | 43.0 (0.6)   | 288             | 69.7 (0.5)  | 115             | 88.1 (0.6)  | 54       | 108.4 (1.6) |
| 50.8 < AC ≤110.2                   | 228      | 51.6 (0.7)   | 375             | 71.9 (0.4)  | 371             | 88.2 (0.4)  | 243      | 113.0 (1.1) |
| 110.2 < AC ≤187.9                  | 122      | 53.0 (0.8)   | 302             | 72.3 (0.4)  | 387             | 89.3 (0.3)  | 418      | 115.6 (1.1) |
| AC >187.9                          | 92       | 54.0 (0.6)   | 250             | 71.9 (0.4)  | 363             | 89.9 (0.3)  | 515      | 116.1 (0.7) |
| Moderate-vigorous PA (AC ≥ 760)    |          |              |                 |             |                 |             |          |             |
| AC ≤50.8                           | 717      | 22.2 (0.6)   | 288             | 31.9 (0.7)  | 115             | 36.1 (1.0)  | 54       | 38.7 (1.4)  |
| 50.8 < AC ≤110.2                   | 228      | 77.9 (1.3)   | 375             | 77.7 (1.0)  | 371             | 80.9 (1.0)  | 243      | 85.7 (1.5)  |
| 110.2 < AC ≤187.9                  | 122      | 148.1 (2.1)  | 302             | 142.3 (1.4) | 387             | 144.3 (1.4) | 418      | 148.3 (1.6) |
| AC >187.9                          | 92       | 292.5 (12.3) | 250             | 283.1 (6.7) | 363             | 287.7 (5.6) | 515      | 290.8 (5.9) |
| Total (AC ≥ 100)                   |          |              |                 |             |                 |             |          |             |
| AC ≤50.8                           | 717      | 65.2 (1.0)   | 288             | 101.6 (0.9) | 115             | 124.2 (1.2) | 54       | 147.1 (2.4) |
| 50.8 < AC ≤110.2                   | 228      | 129.5 (1.7)  | 375             | 149.6 (1.1) | 371             | 169.0 (1.1) | 243      | 198.6 (1.4) |
| 110.2 < AC ≤187.9                  | 122      | 201.1 (2.2)  | 302             | 214.6 (1.3) | 387             | 233.9 (1.7) | 418      | 263.9 (2.0) |
| AC >187.9                          | 92       | 346.5 (12.0) | 250             | 355.1 (6.8) | 363             | 377.6 (5.6) | 515      | 406.9 (6.0) |
| <b>Physical activity (minutes)</b> |          |              |                 |             |                 |             |          |             |

|                            |     |              |     |             |     |              |     |              |
|----------------------------|-----|--------------|-----|-------------|-----|--------------|-----|--------------|
| Sedentary (<100)           |     |              |     |             |     |              |     |              |
| AC ≤50.8                   | 717 | 604.6 (6.1)  | 288 | 542.2 (7.3) | 115 | 519.1 (14.0) | 54  | 492.9 (18.5) |
| 50.8< AC ≤110.2            | 228 | 571.9 (4.8)  | 375 | 537.7 (5.3) | 371 | 511.2 (6.3)  | 243 | 453.3 (8.7)  |
| 110.2< AC ≤187.9           | 122 | 565.8 (10.6) | 302 | 519.0 (6.8) | 387 | 481.3 (6.1)  | 418 | 430.9 (5.4)  |
| AC >187.9                  | 92  | 525.3 (11.9) | 250 | 484.1 (7.1) | 363 | 428.4 (5.6)  | 515 | 388.5 (5.3)  |
| Light (100≥AC<760)         |     |              |     |             |     |              |     |              |
| AC ≤50.8                   | 717 | 158.2 (1.8)  | 288 | 233.3 (1.8) | 115 | 289.9 (2.9)  | 54  | 349.6 (6.0)  |
| 50.8< AC ≤110.2            | 228 | 168.0 (2.3)  | 375 | 226.1 (1.4) | 371 | 275.8 (1.7)  | 243 | 343.8 (2.9)  |
| 110.2< AC ≤187.9           | 122 | 167.8 (2.9)  | 302 | 223.4 (1.4) | 387 | 268.9 (1.3)  | 418 | 339.5 (3.0)  |
| AC >187.9                  | 92  | 171.0 (2.0)  | 250 | 217.1 (1.7) | 363 | 263.7 (1.1)  | 515 | 330.4 (1.7)  |
| Moderate-vigorous (AC≥760) |     |              |     |             |     |              |     |              |
| AC ≤50.8                   | 717 | 17.8 (0.5)   | 288 | 27.3 (0.6)  | 115 | 31.7 (0.9)   | 54  | 35.0 (1.2)   |
| 50.8< AC ≤110.2            | 228 | 54.2 (1.2)   | 375 | 59.3 (0.6)  | 371 | 64.6 (0.8)   | 243 | 70.4 (1.1)   |
| 110.2< AC ≤187.9           | 122 | 87.3 (1.9)   | 302 | 94.7 (1.0)  | 387 | 102.2 (1.3)  | 418 | 111.7 (1.0)  |
| AC >187.9                  | 92  | 130.5 (7.8)  | 250 | 147.6 (2.8) | 363 | 171.1 (2.6)  | 515 | 189.3 (3.3)  |
| Total (AC≥100)             |     |              |     |             |     |              |     |              |
| AC ≤50.8                   | 717 | 176.0 (2.1)  | 288 | 260.6 (1.8) | 115 | 321.6 (2.7)  | 54  | 384.6 (6.1)  |
| 50.8< AC ≤110.2            | 228 | 222.1 (2.8)  | 375 | 285.4 (1.7) | 371 | 340.3 (1.6)  | 243 | 414.6 (2.8)  |
| 110.2< AC ≤187.9           | 122 | 255.1 (3.6)  | 302 | 318.1 (1.7) | 387 | 371.1 (1.5)  | 418 | 451.3 (3.1)  |
| AC >187.9                  | 92  | 301.5 (7.9)  | 250 | 364.7 (3.0) | 363 | 434.9 (2.8)  | 515 | 519.7 (3.3)  |

AC – Activity counts

PA – Physical activity

**Table S3. Number of deaths occurrences across joint classifications of light and moderate-to-vigorous physical activity quartiles.**

| Moderate-to-vigorous PA      | Light PA |        |                 |        |                 |        |          |        |
|------------------------------|----------|--------|-----------------|--------|-----------------|--------|----------|--------|
|                              | AC ≤61.8 |        | 61.8 < AC ≤80.5 |        | 80.5 < AC ≤98.5 |        | AC >98.5 |        |
| <b>Mortality Records (n)</b> | N        | Deaths | N               | Deaths | N               | Deaths | N        | Deaths |
| AC ≤50.8                     | 717      | 309    | 288             | 84     | 115             | 27     | 54       | 9      |
| 50.8 < AC ≤110.2             | 228      | 30     | 375             | 44     | 371             | 54     | 243      | 25     |
| 110.2 < AC ≤187.9            | 122      | 13     | 302             | 18     | 387             | 18     | 418      | 19     |
| AC >187.9                    | 92       | 3      | 250             | 8      | 363             | 19     | 515      | 20     |

**Table S4. Joint associations for quartiles of accumulated light and moderate-to-vigorous intensity activity counts after excluding first 2 years of follow-up.**

| <b>Moderate-to-vigorous PA</b> | <b>Light PA</b>   |                   |                   |                   |
|--------------------------------|-------------------|-------------------|-------------------|-------------------|
|                                | AC ≤61.8          | 61.8 < AC ≤80.5   | 80.5 < AC ≤98.5   | AC >98.5          |
|                                | HR (95% CI)       | HR (95% CI)       | HR (95% CI)       | HR (95% CI)       |
| AC ≤50.8                       | 1.00 (REF)        | 0.73 (0.45, 1.17) | 0.72 (0.42, 1.26) | 0.61 (0.21, 1.75) |
| 50.8 < AC ≤110.2               | 0.52 (0.28, 0.97) | 0.50 (0.33, 0.77) | 0.48 (0.31, 0.74) | 0.42 (0.23, 0.80) |
| 110.2 < AC ≤187.9              | 0.45 (0.22, 0.94) | 0.15 (0.07, 0.31) | 0.29 (0.17, 0.48) | 0.18 (0.08, 0.39) |
| AC >187.9                      | 0.06 (0.01, 0.45) | 0.17 (0.06, 0.47) | 0.26 (0.12, 0.58) | 0.28 (0.11, 0.72) |

AC – Activity counts

PA – Physical activity

HR – Hazard ratio

95% CI – 95% Confidence interval

**Figure S1. Hazard ratios\* for jointly classified quartiles of light, moderate-to-vigorous physical activity from Table 3 for each category: by Total activity duration (TAD).**

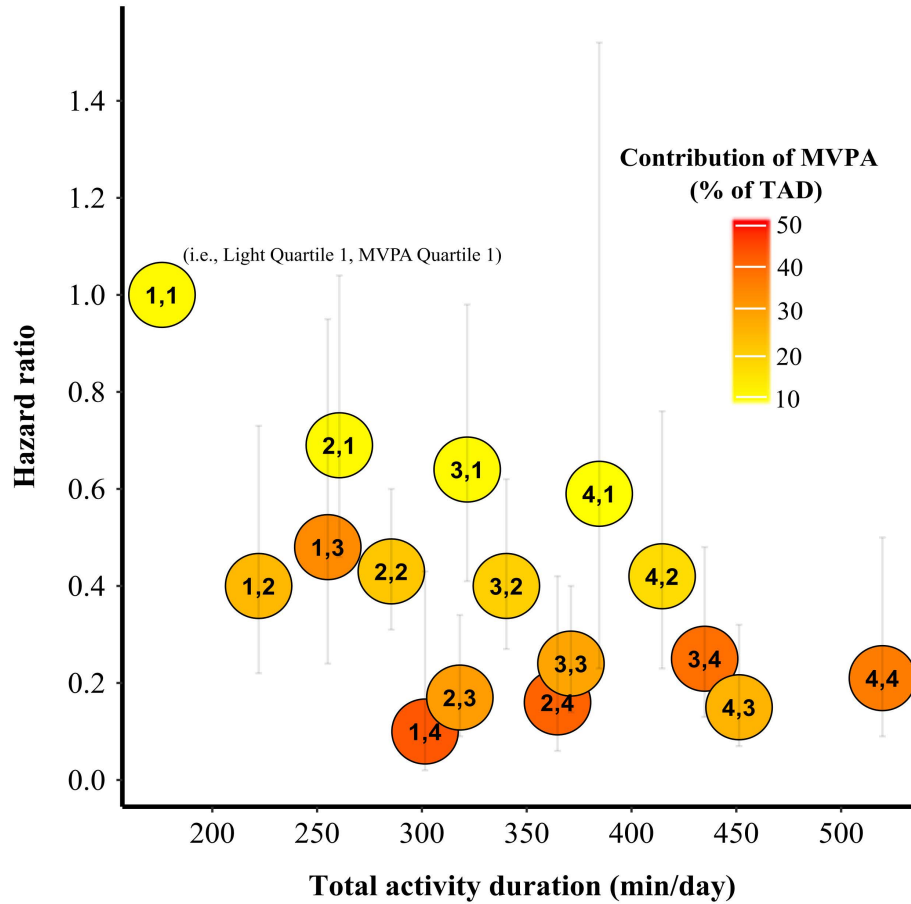

\*HR 1,1 is for quartile 1 for both type of activity, while HR 4,1 is for quartile 4 of light PA and quartile 1 of moderate-to-vigorous PA, etc.

The amount of moderate-to-vigorous PA (MVPA) as a proportion of total activity counts (TAC) is reflected by color (least MVPA bright yellow, most MVPA dark red). For example, quartiles 4,1 spent on average 400 minutes in total activity and approximately 10% of the total activity duration was spent on moderate-to-vigorous PA intensity. The remaining 90% were spent in light PA intensity. Joint quartiles filled with orange indicate joint distributions with relatively similar contributions of moderate-to-vigorous and light PA to total physical activity.
